# Supplementary material for: Selection and Characterization of DNA Aptamers for Constructing Aptamer-AuNPs Colorimetric Method for Detection of AFM1
Source: MDPI journal article supplement (doi:10.3390/foods11121802), 2022-06-18
Supplement: s1 [file s1]

# Selection and Characterization of DNA Aptamers for Constructing Aptamer-AuNPs Colorimetric Method for Detection of AFM1

Ruobing Liu <sup>1</sup>, Fuyuan Zhang <sup>1</sup>, Yaxin Sang <sup>1</sup>, Minxuan Liu <sup>1</sup>, Minghui Shi <sup>1</sup> and Xianghong Wang <sup>1,\*</sup>

<sup>1</sup> College of Food Science and Technology, Hebei Agricultural University, Baoding 071001, China. Koori0520@163.com (Ruobing Liu); zhang.fuyuan@hotmail.com (Fuyuan Zhang); sangyaxin@hebau.edu.cn (Yaxin Sang); lmx0325@126.com (Minxuan Liu); 1870612098@qq.com (Minghui Shi).

\* Correspondence: wangshipin2017@163.com (Xianghong Wang).

## Supplementary Materials:

Table S1. Conditions for 12 rounds of MGO-SELEX screening

| SELEX Round | ssDNA Added (pmol) | Time (min) | Counter SELEX | Recovery |
|-------------|--------------------|------------|---------------|----------|
| 1           | 1000               | 120        | N             | 10.08%   |
| 2           | 500                | 120        | N             | 12.33%   |
| 3           | 500                | 120        | N             | 15.61%   |
| 4           | 200                | 100        | N             | 22.94%   |
| 5           | 200                | 100        | N             | 26.15%   |
| 6           | 100                | 80         | ZEN(100pmol)  | 30.38%   |
| 7           | 100                | 80         | OTA(100pmol)  | 36.59%   |
| 8           | 100                | 80         | FB1(100pmol)  | 42.37%   |
| 9           | 100                | 80         | DON(100pmol)  | 47.86%   |
| 10          | 100                | 80         | T-2 (100pmol) | 50.70%   |
| 11          | 50                 | 60         | N             | 52.71%   |
| 12          | 50                 | 60         | N             | 52.33%   |

Table S2. Aptamer sequence and its Kd value

| Apt | Sequence (5'-3')                                                                  | Length (nt) | Kd (nmol/L) |
|-----|-----------------------------------------------------------------------------------|-------------|-------------|
| 1   | AGCAGCACAGAGGTCAGATGGGATGTGAGGTGGCTCTCGTATCTATAGATTTTGACGAGACCTATGCGTGCTACCGTGAA  | 80          | 19.02±1.939 |
| 2   | AGCAGCACAGAGGTCAGATGAGGTACTTGTGCCGCGTTAATCGAGTGCTTTGCTCTCGGACCTATGCGTGCTACCGTGAA  | 80          | 30.90±2.711 |
| 3   | AGCAGCACAGAGGTCAGATGGGATGTGAGGTGGCTCTCGTATCTATAGATTTTGACGAGGCCTATGCGTGCTACCGTGAA  | 80          | 26.95±4.133 |
| 4   | AGCAGCACAGAGGTCAGATGTCGTCTCACGACTTCTTTCTTGCGCTGTCGGCCGAGAAACCTATGCGTGCTACCGTGAA   | 80          | 12.15±1.91  |
| 5   | AGCAGCACAGAGGTCAGATGGGATGTGAGGTGGCTCTCGTATCTATAGATTTTGCGGAGACCTATGCGTGCTACCGTGAA  | 80          | 8.12±1.509  |
| 6   | AGCAGCACAGAGGTCAGATGGGATGTGAGGTGGCCCTCGTATCTATAGATTTTGACGAGACCTATGCGTGCTACCGTGAA  | 80          | 12.44±2.74  |
| 7   | AGCAGCACAGAGGTCAGATGGGATGTGGGTGGCTCTCGTATCTATAGATTTTGACGAGACCTATGCGTGCTACCGTGAA   | 80          | 11.71±3.795 |
| 8   | AGCAGCACAGAGGTCAGATGAGCCAGGGGCGGCGCAAATTTCCGCTAAAATTTGAAGACCTATGCGTGCTACCGTGAA    | 80          | 16.80±3.32  |
| 9   | AGCAGCACAGAGGTCAGATGGGATGTGAGGTGGCTCCCGTATCTATAGATTTTGACGAGACCTATGCGTGCTACCGTGAA  | 80          | 14.53±3.08  |
| 10  | AGCAGCACAGAGGTCAGATGGGACGTGAGGTGGCTCTCGTATCTATAGATTTTGACGAGACCTATGCGTGCTACCGTGAA  | 80          | 8.78±1.713  |
| 11  | AGCAGCACAGAGGTCAGATGGGATGTGAGGCGGCTCTCGTATCTATAGATTTTGACGAGACCTATGCGTGCTACCGTGAA  | 80          | 14.53±2.47  |
| 12  | AGCAGCACAGAGGTCAGATGGGATGTGAGGTGGCTCTCGTATCTATAGATTTTGACGAGACCTATGCGTGCTACCGTGAA  | 80          | 27.07±3.52  |
| 13  | AGCAGCACAGAGGTCAGATGTGTCTGAGGGGTACCCCTTCGTTGACTTTGTGCGACAACTCCTATGCGTGCTACCGTGAA  | 80          | 35.62±4.392 |
| 14  | AGCAGCACAGAGGTCAGATGGGATGCGAGGTGGCTCTCGTATCTATAGATTTTGACGAGACCTATGCGTGCTACCGTGAA  | 80          | 19.05±2.61  |
| 15  | AGCAGCACAGAGGTCAGATGGGATGTGAGGTGACTCTCGTATCTATAGATTTTGACGAGACCTATGCGTGCTACCGTGAA  | 80          | 22.06±3.29  |
| 16  | AGCAGCACAGAGGTCAGATGCGCGGAGACCGTTTGGTCGGAGCGTTTGCAATTGACGAAAACCTATGCGTGCTACCGTGAA | 80          | 20.12±3.011 |
| 17  | AGCAGCACAGAGGTCAGATGGGATGTGAGGTGGCTCTCGTACCTATAGATTTTGACGAGACCTATGCGTGCTACCGTGAA  | 80          | 13.86±2.485 |
| 18  | AGCAGCACAGAGGTCAGATGGGATGTGAGGTGGCTCTCGTATCTATAGACTTTGACGAGACCTATGCGTGCTACCGTGAA  | 80          | 13.87±2.57  |
| 19  | AGCAGCACAGAGGTCAGATGGGATGTGAGGTGGCTCTCGTATCTATAGATTTTGACGGGACCTATGCGTGCTACCGTGAA  | 80          | 18.75±2.085 |
| 20  | AGCAGCACAGAGGTCAGATGGGATGTGAGGTGGCTCTCGCATCTATAGATTTTGACGAGACCTATGCGTGCTACCGTGAA  | 80          | 30.73±3.80  |
| 21  | AGCAGCACAGAGGTCAGATGGGGTGTGAGGTGGCTCTCGTATCTATAGATTTTGACGAGACCTATGCGTGCTACCGTGAA  | 80          | 16.47±3.39  |
| 22  | AGCAGCACAGAGGTCAGATGGGATGTGAGGTGGCTCTCGTATCTATGGATTTTGACGAGACCTATGCGTGCTACCGTGAA  | 80          | 19.12±3.11  |
| 23  | AGCAGCACAGAGGTCAGATGGGATGTGAGGTGGCTCTCGTATCTACAGATTTTGACGAGACCTATGCGTGCTACCGTGAA  | 80          | 18.01±3.555 |
| 24  | AGCAGCACAGAGGTCAGATGGGATGTGAGGTGGCTCTCGTGTCTATAGATTTTGACGAGACCTATGCGTGCTACCGTGAA  | 80          | 18.64±3.24  |
| 5T1 | AGGTCAGATGGGATGTGAGGTGGCTCTCGTATCTATAGATTTTGCGGAGACCT                             | 53          | 10.53±1.59  |
| 5T2 | GGGATGTGAGGTGGCTCTCGT                                                             | 21          | 10.04±1.34  |
| 5M  | AGCAGCACAGAGGTCAGATGGGATGTCCGGTGGCTCCCGTATCTATAGATTTTGCGGAGACCTATGCGTGCTACCGTGAA  | 80          | -           |

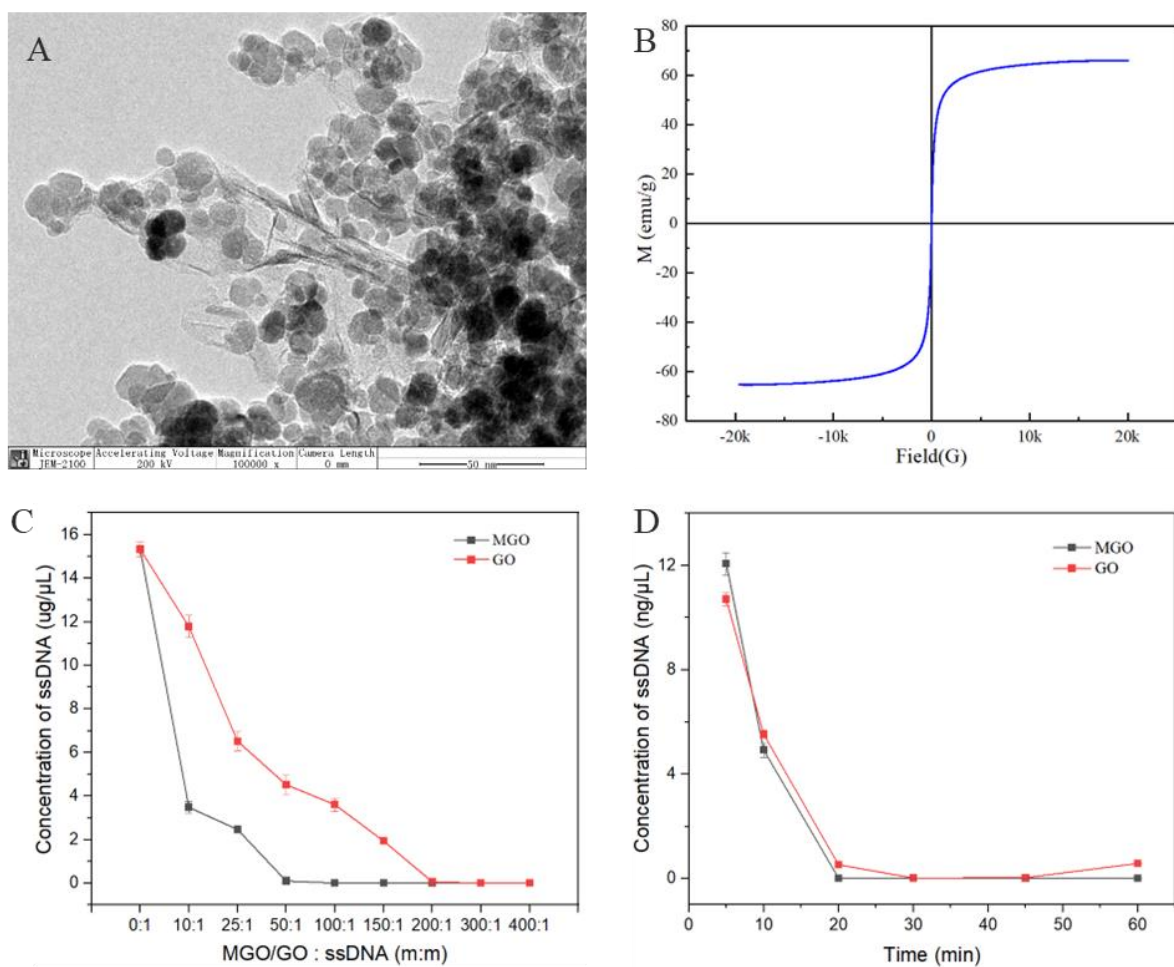

**Figure S1.** (A)TEM and (B)VSM of MGO, Comparison of the (C) mass ratio and (D) incubation time of MGO and GO to ssDNA library.

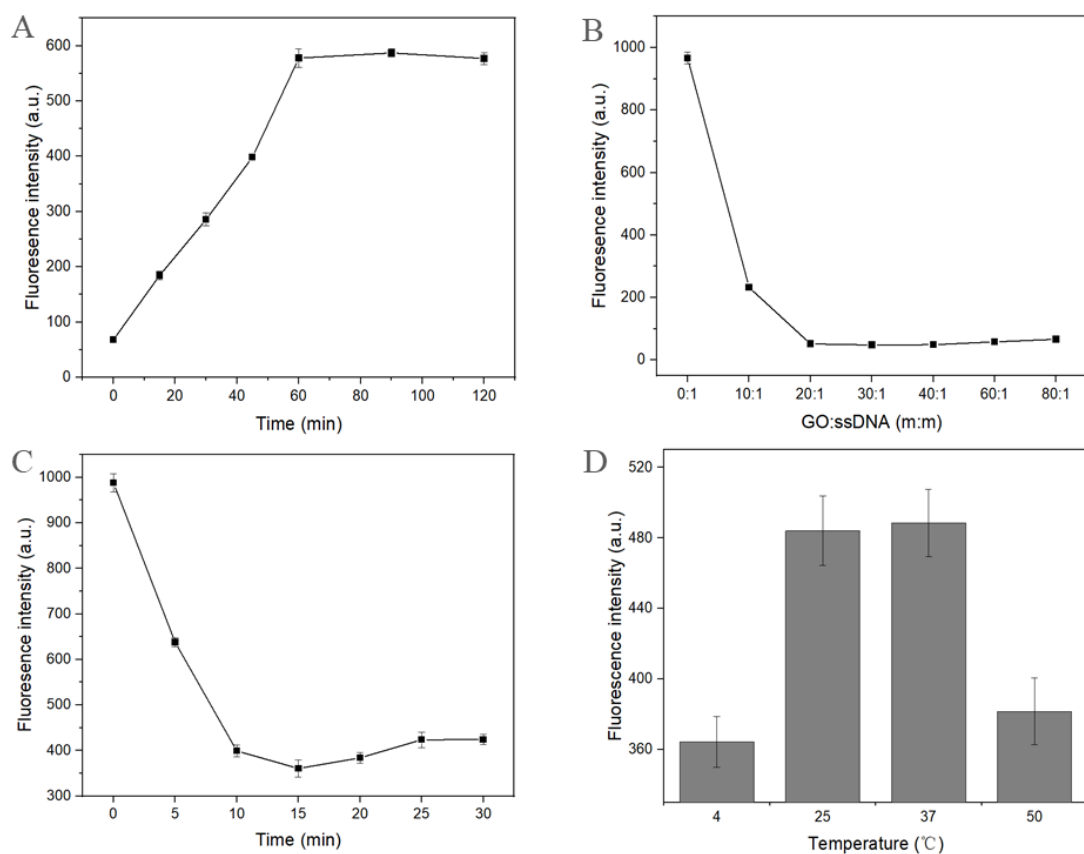

**Figure S2.** Optimization of the binding affinity conditions. (A) Binding time of aptamer and AFM1, (B) Mass ratio of GO and FAM-labeled aptamers, (C) Quenching time, (D) Working temperature.

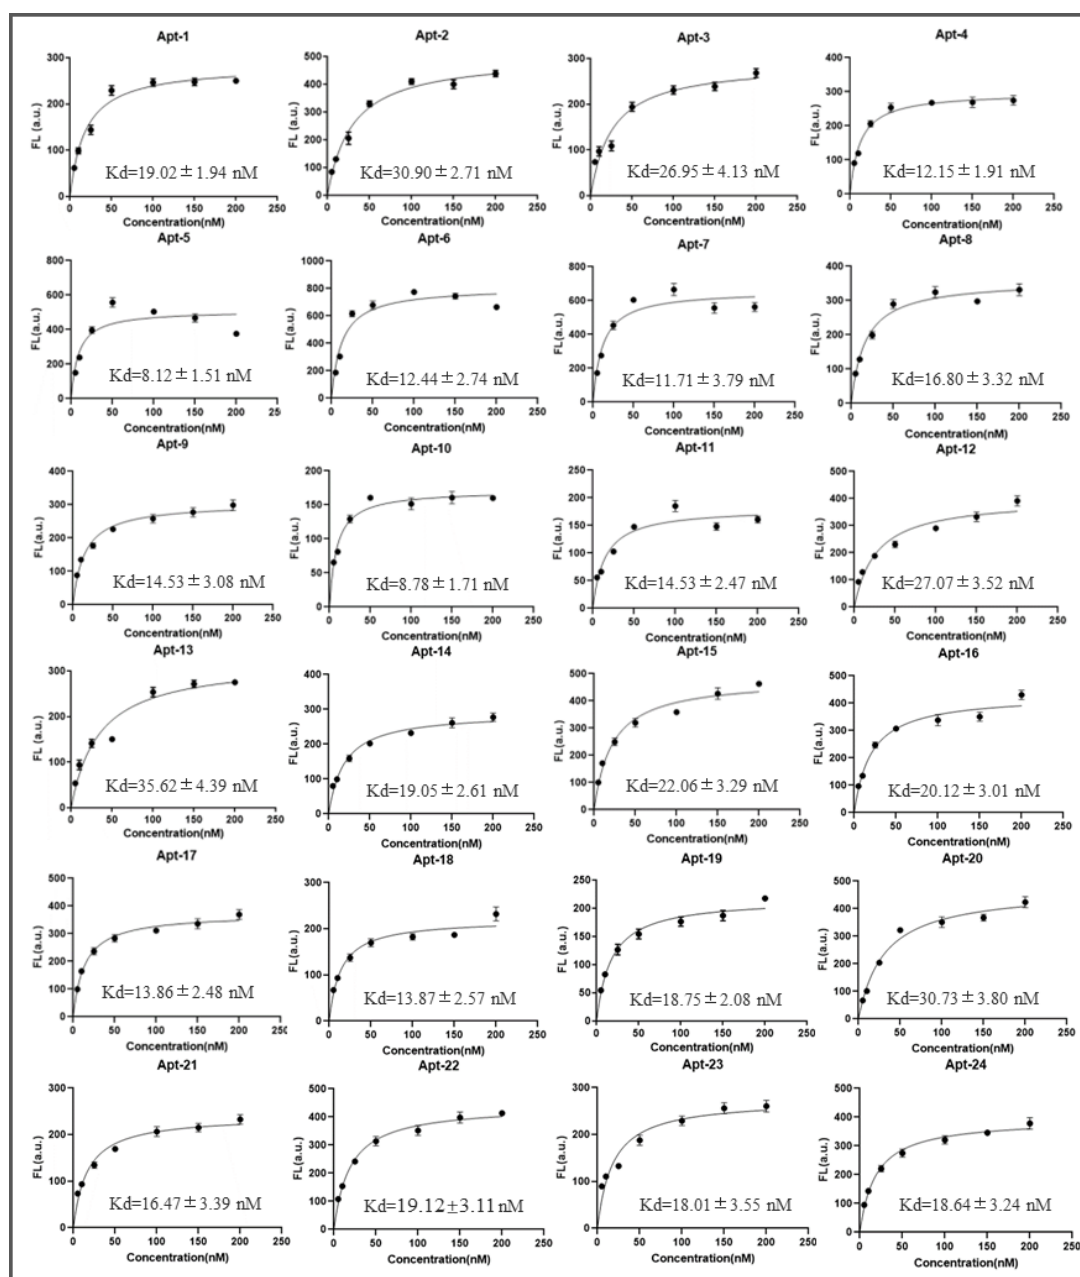

**Figure S3.** Affinity nonlinear fitting curve of 24 aptamers.

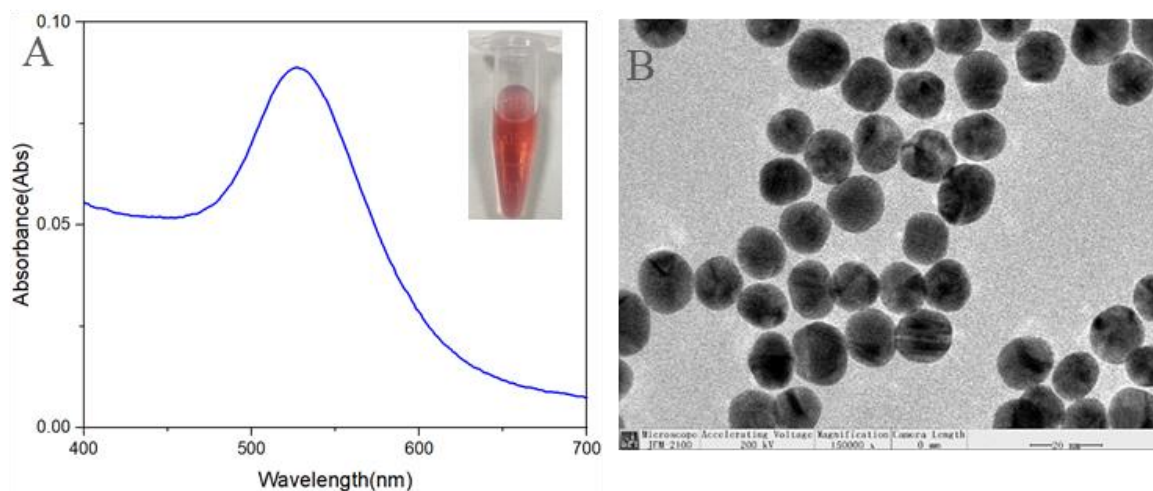

**Figure S4.** UV absorption curve (A) and TEM (B) of AuNPs.

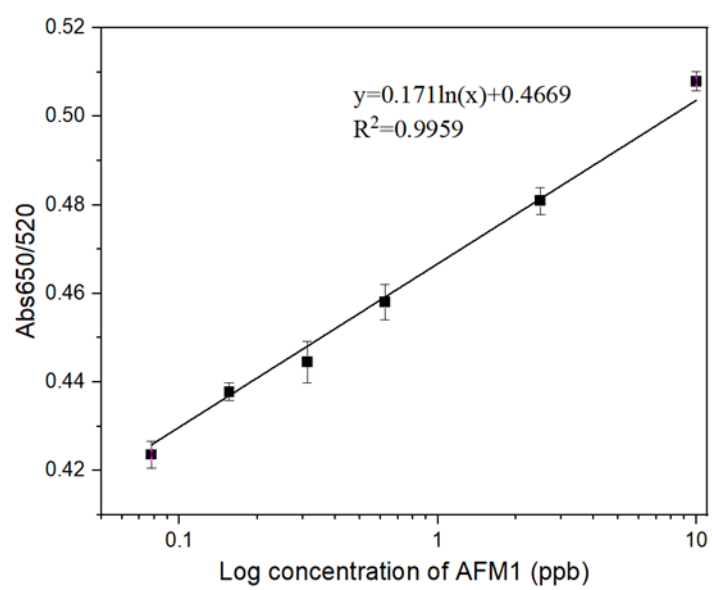

**Figure S5.** Detection curve developed in the milk extract.
